# Supplementary material for: Photodegradation mechanism of the common non-steroid anti-inflammatory drug diclofenac and its carbazole photoproduct
Source: Royal Society of Chemistry journal article supplement (doi:10.1039/b900144a), 2009-01-01
Supplement: b900144a.pdf [file b900144a.pdf]

## Photodegradation Mechanism of the Common Non-Steroid Anti-Inflammatory Drug Diclofenac and its Carbazole Photoproduct

Klefah A. K. Musa and Leif A. Eriksson\*

School of Science and Technology and Örebro Life Science Center  
 Örebro University, 701 82 Örebro, Sweden

### Supporting Information

**Table S1:** Mulliken atomic charges (B3LYP/6-31G(d,p) level) for selected atoms in different intermediates of the photodegradation mechanism shown in Fig. 2. For atomic labeling see Fig. 1.

| system                                 | C <sub>1</sub> | C <sub>2</sub> | C <sub>8</sub> | C <sub>10</sub> | N <sub>9</sub> | O <sub>19</sub> | O <sub>20</sub> | H <sub>18</sub> | H <sub>21</sub> | Cl <sub>16</sub> |
|----------------------------------------|----------------|----------------|----------------|-----------------|----------------|-----------------|-----------------|-----------------|-----------------|------------------|
| A (singlet)                            | 0.586          | -0.322         | 0.250          | 0.316           | -0.699         | -0.469          | 0.469           | 0.308           | 0.326           |                  |
| A <sup>•-</sup> (doublet) <sup>a</sup> | 0.556          |                | 0.260          | 0.235           | -0.651         | -0.487          | -0.486          | 0.286           | 0.303           | -0.313           |
| A <sup>•+</sup> (doublet)              | 0.614          | -0.352         | 0.266          | 0.297           | -0.615         | -0.475          | -0.438          | 0.355           | 0.355           |                  |
| <sup>3</sup> A (triplet)               | 0.592          | -0.341         | 0.261          | 0.340           | -0.647         | -0.470          | -0.464          | 0.322           | 0.331           | -0.222           |
| A <sup>-</sup> (singlet)               | 0.555          | -0.326         | 0.251          | 0.351           | -0.739         | -0.614          | -0.571          | 0.388           |                 |                  |
| <sup>3</sup> A <sup>-</sup> (triplet)  | 0.566          | -0.334         | 0.302          | 0.285           | -0.660         | -0.517          | -0.493          | 0.381           |                 | -0.576           |
| B (singlet)                            | 0.584          | -0.308         | 0.259          | 0.330           | -0.721         | -0.471          | -0.469          | 0.291           | 0.328           |                  |
| B <sup>•-</sup> (doublet)              | 0.540          | -0.276         | 0.246          | 0.327           | -0.722         | -0.517          | -0.502          | 0.272           | 0.299           |                  |
| B <sup>•+</sup> (doublet)              | 0.610          | -0.340         | 0.254          | 0.336           | -0.656         | -0.482          | -0.438          | 0.339           | 0.355           |                  |
| <sup>3</sup> B (triplet)               | 0.579          | -0.300         | 0.283          | 0.359           | -0.710         | -0.475          | -0.470          | 0.295           | 0.327           |                  |
| B <sup>-</sup> (singlet)               | 0.554          | -0.322         | 0.203          | 0.340           | -0.733         | -0.617          | -0.567          | 0.376           |                 |                  |
| <sup>3</sup> B <sup>-</sup> (triplet)  | 0.569          | -0.333         | 0.241          | 0.331           | -0.686         | -0.555          | -0.522          | 0.305           |                 |                  |
| <sup>3</sup> C (triplet)               | 0.741          | -0.322         | 0.212          |                 | -0.714         | -0.375          | -0.343          | 0.276           |                 |                  |
| C(singlet)                             | 0.551          | -0.318         | 0.200          | 0.306           | -0.715         | -0.624          | -0.577          | 0.334           |                 |                  |
| D(singlet)                             | 0.317          | -0.271         | 0.212          | 0.315           | -0.713         | -0.621          | -0.580          | 0.340           |                 |                  |
| <sup>1</sup> E <sup>*</sup> (singlet)  |                | -0.457         | 0.121          | 0.349           | -0.706         |                 |                 | 0.251           |                 |                  |
| <sup>3</sup> E <sup>*</sup> (triplet)  |                | -0.343         | 0.195          | 0.339           | -0.731         |                 |                 | 0.238           |                 |                  |
| E(singlet)                             |                | -0.394         | 0.251          | 0.337           | -0.729         |                 |                 | 0.267           |                 |                  |
| F(singlet) <sup>b</sup>                |                | -0.268         | 0.255          | 0.333           | -0.735         |                 |                 | 0.274           |                 |                  |
| G (singlet) <sup>c</sup>               |                |                | 0.258          | 0.338           | -0.739         |                 |                 | 0.265           |                 |                  |

<sup>a</sup> the charge of "Cl<sub>17</sub>" atom = -0.710

<sup>b</sup> the charge of "O" of -CHO group = -0.421

<sup>c</sup> the charge of "O" of -OH group = -0.543 and "H" = 0.313

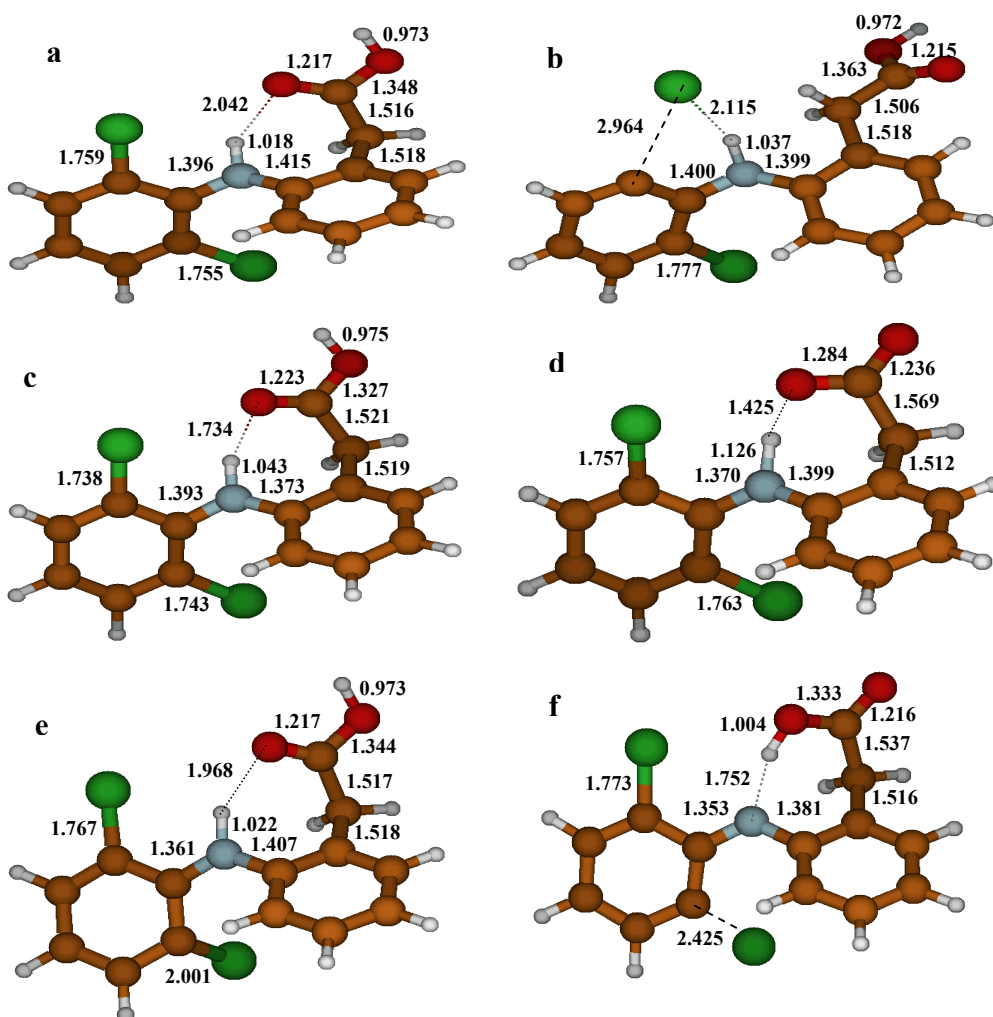

**Figure S1.** B3LYP/6-31G(d,p) optimized structures DF; (a) neutral ground state ( $A$ ), (b) radical anion ( $A^-$ ), (c) radical cation ( $A^+$ ), (d) deprotonated acid ( $A^-$ ), (e) neutral triplet state ( $^3A$ ) and (f) deprotonated triplet state ( $^3A^-$ ).

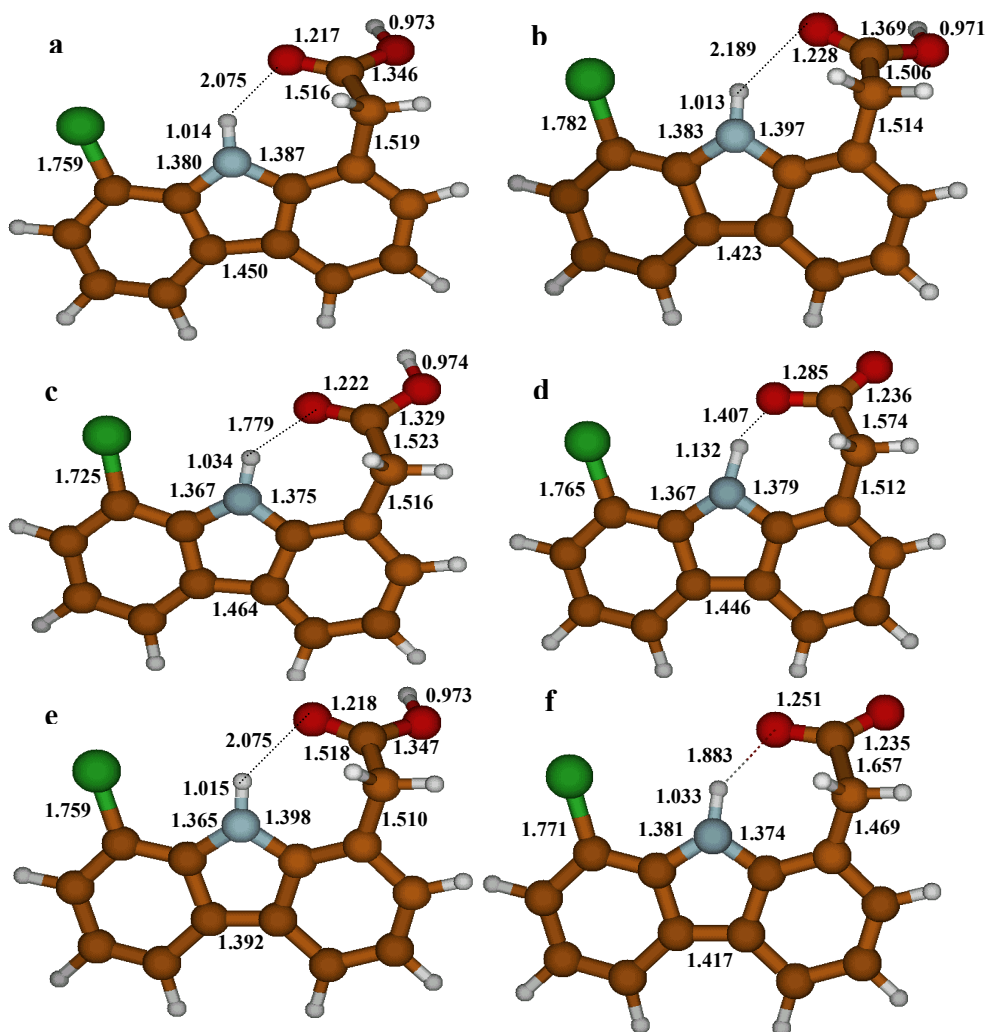

**Figure S2.** B3LYP/6-31G(d,p) optimized structures of CCA; (a) neutral ground state ( $\mathbf{B}$ ), (b) radical anion ( $\mathbf{B}^-$ ), (c) radical cation ( $\mathbf{B}^+$ ), (d) deprotonated acid ( $\mathbf{B}$ ), (e) neutral triplet state ( ${}^3\mathbf{B}$ ) and (f) deprotonated triplet state ( ${}^3\mathbf{B}^-$ ).

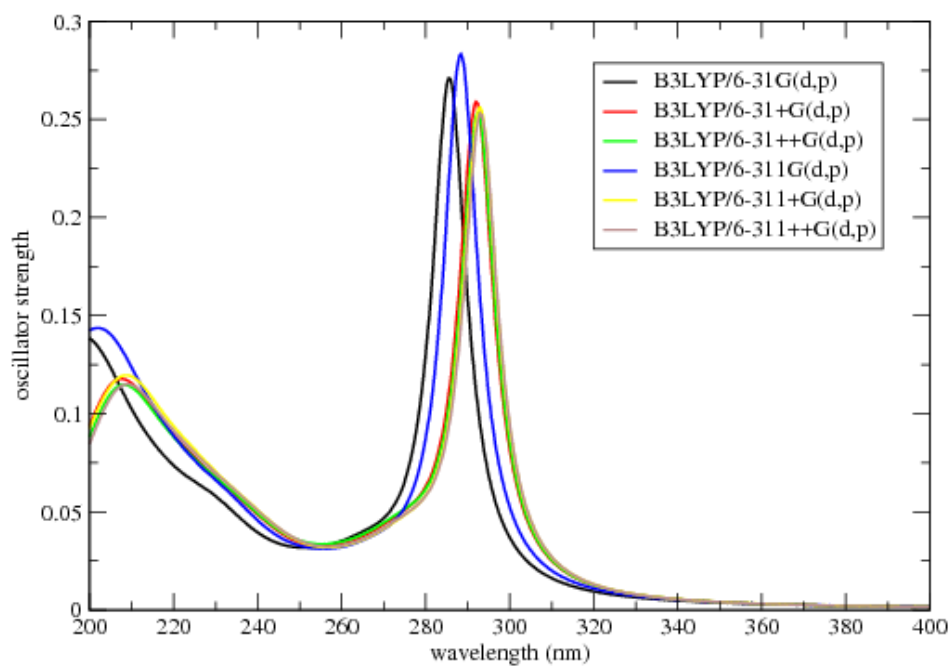

**Figure S3.** Absorption spectra of neutral Dichlofenac, computed with different basis sets, with and without diffuse functions, in the TD-DFT framework.
